# Supplementary material
Source: PubMed Central journal article supplement (PMC8218777)
Supplement: jcm.00800-21-s0001.pdf [file jcm.00800-21-s0001.pdf]

**Table S1. Mathematical formulas for calculating all CV values:**

|                                                                                                                                                                                     |
|-------------------------------------------------------------------------------------------------------------------------------------------------------------------------------------|
| $CV_{\text{FULL}} = (CV_{\text{FULL-EXTRACTION}}^2 + CV_{\text{FULL-SPOT}}^2)^{1/2}$                                                                                                |
| $CV_{\text{IN-TARGET}} = (CV_{\text{INTARGET-EXTRACTION}}^2 + CV_{\text{INTARGET-SPOT}}^2)^{1/2} = (CV_{\text{INTARGET-EXTRACTION}}^2 + 0)^{1/2} = CV_{\text{INTARGET-EXTRACTION}}$ |
| $CV_{\text{TOTAL}} = (CV_{\text{EXTRACTION}}^2 + CV_{\text{MALDI}}^2)^{1/2}$                                                                                                        |
| $BV_{\text{INTRA}} = (CV_{\text{TOTAL-Day1}} + CV_{\text{TOTAL-Day2}} + CV_{\text{TOTAL-Day3}}) / 3$                                                                                |
| $BV_{\text{INTER}} = CV_{\text{TOTAL-ALLDAYS}}$                                                                                                                                     |

**Table S2.** Procedures for bacterial protein extraction

| "In-Target" extraction:                                                                                                                                | "Full" extraction:                                                                                                                              |
|--------------------------------------------------------------------------------------------------------------------------------------------------------|-------------------------------------------------------------------------------------------------------------------------------------------------|
| 1. Spot a tiny portion of a colony in a spot                                                                                                           | 1. Suspend colony in 300 $\mu$ l of H <sub>2</sub> O in an Eppendorf tube.                                                                      |
| 2. Overlay it with 1 $\mu$ l of pure formic acid (Sigma Aldrich, Germany) and wait until drying.                                                       | 2. Vortex until the suspension is completely homogeneous.                                                                                       |
| 3. Apply 1 $\mu$ l of IVD Matrix HCCA-portioned (Bruker Daltonics, Germany) dissolved in 50% acetonitrile, 47.5% water and 2.5 % trifluoroacetic acid. | 3. Add 900 $\mu$ l of ethanol.                                                                                                                  |
| 4. Measurement is performed after drying.                                                                                                              | 4. Invert the tube several times and centrifuge for 2 min at 14,000 rpm.                                                                        |
|                                                                                                                                                        | 5. Pipette and discard supernatant.                                                                                                             |
|                                                                                                                                                        | 6. Spin until all the remaining ethanol remains at the bottom of the tube.                                                                      |
|                                                                                                                                                        | 7. Pipette again to discard all ethanol and allow to dry completely (5 min).                                                                    |
|                                                                                                                                                        | 8. Add formic acid (AF, 70%), about ~15 $\mu$ l, depending on the size of the pellet. Pipette up and down until homogenized and wait for 2 min. |
|                                                                                                                                                        | 5. Add the same amount of acetonitrile (ACN), pipette up and down until homogenized.                                                            |
|                                                                                                                                                        | 6. Centrifuge for 2 min at 14.000 rpm.                                                                                                          |
|                                                                                                                                                        | 7. Add a drop of supernatant to the MALDI target plate.                                                                                         |
|                                                                                                                                                        | 8. Allow to dry and add 1 $\mu$ l of matrix (HCCA).                                                                                             |

**Table S3. Characteristics of the carbapenemase-producing *K. pneumoniae* isolates used in the study.**

| Strain                    | ST         | Resistance gene | Hospital                                                |
|---------------------------|------------|-----------------|---------------------------------------------------------|
| <b>AI2818<sup>a</sup></b> | <b>15</b>  | <b>OXA-48</b>   | <b>Hospital Universitario Gregorio Marañón (Madrid)</b> |
| AI2819                    | 15         | OXA-48          | Hospital Universitario Gregorio Marañón (Madrid)        |
| AI2594                    | 15         | OXA-48          | Hospital Universitario Gregorio Marañón (Madrid)        |
| <b>AI2612<sup>a</sup></b> | <b>15</b>  | <b>OXA-48</b>   | <b>Hospital Arquitecto Marcide (Ferrol)</b>             |
| <b>AI2829<sup>a</sup></b> | <b>15</b>  | <b>OXA-48</b>   | <b>Hospital Universitario Lucus Augusti (Lugo)</b>      |
| <b>AI2627<sup>a</sup></b> | <b>512</b> | <b>KPC-3</b>    | <b>Hospital Puerta del Mar (Cádiz)</b>                  |
| <b>AI2628<sup>a</sup></b> | <b>512</b> | <b>KPC-3</b>    | <b>Hospital Puerta del Mar (Cádiz)</b>                  |
| AI2629                    | 512        | KPC-3           | Hospital Puerta del Mar (Cádiz)                         |
| <b>AI2630<sup>a</sup></b> | <b>15</b>  | <b>OXA-48</b>   | <b>Hospital Puerta del Mar (Cádiz)</b>                  |
| AI2631                    | 512        | KPC-3           | Hospital Puerta del Mar (Cádiz)                         |
| AI2836                    | 512        | KPC-3           | Hospital Puerta del Mar (Cádiz)                         |
| AI2632                    | 512        | KPC-3           | Hospital Puerta del Mar (Cádiz)                         |
| AI2837                    | 512        | KPC-3           | Hospital Puerta del Mar (Cádiz)                         |
| <b>AI2873<sup>a</sup></b> | <b>11</b>  | <b>OXA-48</b>   | <b>Hospital Universitario Ramón y Cajal (Madrid)</b>    |
| <b>AI2874<sup>a</sup></b> | <b>11</b>  | <b>OXA-48</b>   | <b>Hospital Universitario Ramón y Cajal (Madrid)</b>    |
| AI2875                    | 11         | OXA-48          | Hospital Universitario Ramón y Cajal (Madrid)           |
| AI2876                    | 11         | OXA-48          | Hospital Universitario Ramón y Cajal (Madrid)           |
| AI2877                    | 11         | OXA-48          | Hospital Universitario Ramón y Cajal (Madrid)           |
| AI2878                    | 11         | OXA-48          | Hospital Universitario Ramón y Cajal (Madrid)           |
| AI2879                    | 11         | OXA-48          | Hospital Universitario Ramón y Cajal (Madrid)           |
| <b>AI2886<sup>a</sup></b> | <b>15</b>  | <b>OXA-48</b>   | <b>Hospital Universitario Ramón y Cajal (Madrid)</b>    |
| AI2891                    | 11         | OXA-48          | Hospital Universitario Ramón y Cajal (Madrid)           |
| AI2892                    | 11         | OXA-48          | Hospital Universitario Ramón y Cajal (Madrid)           |
| AI2895                    | 11         | OXA-48          | Hospital Universitario Ramón y Cajal (Madrid)           |
| AI2665                    | 15         | OXA-48          | Hospital Universitario Central de Asturias (Oviedo)     |
| AI2669                    | 15         | OXA-48          | Hospital Universitario Central de Asturias (Oviedo)     |
| AI2698                    | 15         | OXA-48          | Hospital Universitario Central de Asturias (Oviedo)     |
| AI3042                    | 11         | KPC-2           | Hospital Virgen de la Salud (Toledo)                    |
| AI3048                    | 11         | KPC-2           | Hospital de Guadalajara (Guadalajara)                   |
| AI3056                    | 1961       | KPC-2           | ND*                                                     |
| AI2700                    | 1961       | KPC-2           | Complejo Hospitalario de Pontevedra (Pontevedra)        |
| AI2701                    | 273        | KPC-2           | Hospital Universitario Gregorio Marañón (Madrid)        |
| AI2979                    | 1961       | KPC-2           | Complejo Hospitalario de Pontevedra (Pontevedra)        |
| <b>AI2706<sup>a</sup></b> | <b>512</b> | <b>KPC-3</b>    | <b>Hospital General La Mancha Centro (Ciudad Real)</b>  |
| AI2980                    | 1961       | KPC-2           | Complejo Hospitalario de Pontevedra (Pontevedra)        |
| AI2982                    | 1961       | KPC-2           | Complejo Hospitalario de Pontevedra (Pontevedra)        |
| AI2713                    | 273        | KPC-2           | Hospital Universitario Gregorio Marañón (Madrid)        |

|                           |            |               |                                                                 |
|---------------------------|------------|---------------|-----------------------------------------------------------------|
| AI2717                    | 1961       | KPC-2         | Complejo Hospitalario de Pontevedra (Pontevedra)                |
| AI2985                    | 1961       | KPC-2         | Complejo Hospitalario de Pontevedra (Pontevedra)                |
| AI3060                    | 1961       | KPC-2         | Complejo Hospitalario de Pontevedra (Pontevedra)                |
| <b>AI2739<sup>a</sup></b> | <b>11</b>  | <b>OXA-48</b> | <b>Hospital Universitario Marqués de Valdecilla (Santander)</b> |
| <b>AI2742<sup>a</sup></b> | <b>11</b>  | <b>OXA-48</b> | <b>Hospital Universitario Marqués de Valdecilla (Santander)</b> |
| AI2743                    | 11         | OXA-48        | Hospital Universitario Marqués de Valdecilla (Santander)        |
| AI2989                    | 11         | OXA-48        | Hospital Universitario Marqués de Valdecilla (Santander)        |
| AI2745                    | 11         | OXA-48        | Hospital Universitario Marqués de Valdecilla (Santander)        |
| AI2748                    | 11         | OXA-48        | Hospital Universitario Marqués de Valdecilla (Santander)        |
| AI2763                    | 147        | OXA-48        | Hospital Univeristario de Bellvitge (Barcelona)                 |
| AI2764                    | 147        | OXA-48        | Hospital Univeristario de Bellvitge (Barcelona)                 |
| AI2765                    | 147        | OXA-48        | Hospital Univeristario de Bellvitge (Barcelona)                 |
| AI2766                    | 147        | OXA-48        | Hospital Univeristario de Bellvitge (Barcelona)                 |
| AI2767                    | 147        | OXA-48        | Hospital Univeristario de Bellvitge (Barcelona)                 |
| AI2993                    | 147        | OXA-48        | Hospital Univeristario de Bellvitge (Barcelona)                 |
| AI2768                    | 147        | OXA-48        | Hospital Univeristario de Bellvitge (Barcelona)                 |
| AI2769                    | 147        | OXA-48        | Hospital Univeristario de Bellvitge (Barcelona)                 |
| AI2770                    | 147        | OXA-48        | Hospital Univeristario de Bellvitge (Barcelona)                 |
| AI2996                    | 147        | OXA-48        | Hospital Univeristario de Bellvitge (Barcelona)                 |
| AI2998                    | 147        | OXA-48        | Hospital Univeristario de Bellvitge (Barcelona)                 |
| AI2773                    | 307        | OXA-48        | Hospital Univeristario de Bellvitge (Barcelona)                 |
| AI2775                    | 147        | OXA-48        | Hospital Univeristario de Bellvitge (Barcelona)                 |
| AI3001                    | 307        | OXA-48        | Hospital Universitario Valencia Tres cruces (Valencia)          |
| <b>AI2776<sup>a</sup></b> | <b>11</b>  | <b>OXA-48</b> | <b>Hospital Universitario Valencia Tres cruces (Valencia)</b>   |
| AI2777                    | 307        | OXA-48        | Hospital Universitario Valencia Tres cruces (Valencia)          |
| AI2778                    | 11         | OXA-48        | Hospital Universitario Valencia Tres cruces (Valencia)          |
| AI2780                    | 11         | OXA-48        | Hospital Universitario Valencia Tres cruces (Valencia)          |
| AI2781                    | 307        | OXA-48        | Hospital Universitario Valencia Tres cruces (Valencia)          |
| AI3002                    | 307        | OXA-48        | Hospital Universitario Valencia Tres cruces (Valencia)          |
| AI3003                    | 307        | OXA-48        | Hospital Universitario Valencia Tres cruces (Valencia)          |
| AI3004                    | 307        | OXA-48        | Hospital Universitario Valencia Tres cruces (Valencia)          |
| AI3006                    | 307        | OXA-48        | Hospital Universitario Valencia Tres cruces (Valencia)          |
| AI2789                    | 307        | OXA-48        | Hospital Universitario Valencia Tres cruces (Valencia)          |
| AI2791                    | 307        | OXA-48        | Hospital Universitario Valencia Tres cruces (Valencia)          |
| AI3009                    | 307        | OXA-48        | Hospital Universitario Valencia Tres cruces (Valencia)          |
| AI2794                    | 307        | OXA-48        | Hospital Universitario Valencia Tres cruces (Valencia)          |
| <b>AI2805<sup>a</sup></b> | <b>512</b> | <b>KPC-3</b>  | <b>Hospital Reina Sofía (Córdoba)</b>                           |
| <b>AI2806<sup>a</sup></b> | <b>512</b> | <b>KPC-3</b>  | <b>Hospital Reina Sofía (Córdoba)</b>                           |
| AI2807                    | 512        | KPC           | Hospital Reina Sofía (Córdoba)                                  |
| AI2808                    | 512        | KPC-3         | Hospital Reina Sofía (Córdoba)                                  |

|                       |                 |                 |                                                        |
|-----------------------|-----------------|-----------------|--------------------------------------------------------|
| AI2809                | 512             | KPC-3           | Hospital Reina Sofía (Córdoba)                         |
| AI2810                | 512             | KPC-3           | Hospital Reina Sofía (Córdoba)                         |
| AI2811                | 512             | KPC-3           | Hospital Reina Sofía (Córdoba)                         |
| AI2812                | 512             | KPC-3           | Hospital Reina Sofía (Córdoba)                         |
| AI2813                | 512             | KPC-3           | Hospital Reina Sofía (Córdoba)                         |
| AI2814                | 512             | KPC-3           | Hospital Reina Sofía (Córdoba)                         |
| AI2815                | 512             | KPC-3           | Hospital Reina Sofía (Córdoba)                         |
| AI2816                | 512             | KPC-3           | Hospital Reina Sofía (Córdoba)                         |
| AI2817                | 512             | KPC-3           | Hospital Reina Sofía (Córdoba)                         |
| 1                     | 273             | KPC-2           | U*                                                     |
| <b>2<sup>a</sup></b>  | <b>11</b>       | <b>KPC-2</b>    | <b>U*</b>                                              |
| <b>3<sup>a</sup></b>  | <b>11</b>       | <b>KPC-2</b>    | <b>U*</b>                                              |
| 4                     | 101             | KPC-2           | U*                                                     |
| 5                     | 101             | KPC-2           | U*                                                     |
| 6                     | 512             | KPC-3           | U*                                                     |
| 7                     | 512             | KPC-3           | U*                                                     |
| 8                     | 512             | KPC-3           | U*                                                     |
| 9                     | 512             | KPC-3           | U*                                                     |
| 10                    | 512             | KPC-3           | U*                                                     |
| 11                    | 101             | KPC-2           | U*                                                     |
| <b>12<sup>a</sup></b> | <b>11</b>       | <b>KPC-2</b>    | <b>U*</b>                                              |
| <b>13<sup>a</sup></b> | <b>11</b>       | <b>KPC-2</b>    | <b>U*</b>                                              |
| 14                    | 15              | OXA-48          | Hospital Universitario A Coruña (CHUAC)                |
| 15                    | 15              | OXA-48          | Hospital Universitario A Coruña (CHUAC)                |
| 16                    | 405             | OXA-48          | U*                                                     |
| 17                    | 11              | OXA-48          | U*                                                     |
| AI2830                | 147             | NDM-1           | Hospital Universitario Lucus Augusti (Lugo)            |
| AI2880                | 101             | NDM-1           | Hospital Universitario Ramón y Cajal (Madrid)          |
| AI2898                | 101             | NDM-1           | Hospital Universitario Ramón y Cajal (Madrid)          |
| AI2934                | 395             | NDM-1           | Hospital Virgen de la Macarena (Sevilla)               |
| AI2779                | 437             | NDM-23          | Hospital Universitario Valencia Tres cruces (Valencia) |
| AI3007                | 101             | NDM-1           | Hospital Universitario Valencia Tres cruces (Valencia) |
| AI2793                | 437             | NDM-1           | Hospital Universitario Valencia Tres cruces (Valencia) |
| 18                    | 512             | KPC-3           | U*                                                     |
| 19                    | 11              | OXA-48          | U*                                                     |
| 20                    | .. <sup>b</sup> | .. <sup>b</sup> | Hospital Universitario A Coruña (CHUAC)                |
| 21                    | -               | -               | Hospital Universitario A Coruña (CHUAC)                |
| 22                    | -               | -               | Hospital Universitario A Coruña (CHUAC)                |
| 23                    | -               | -               | Hospital Universitario A Coruña (CHUAC)                |
| 24                    | -               | -               | Hospital Universitario A Coruña (CHUAC)                |
| 25                    | -               | -               | Hospital Universitario A Coruña (CHUAC)                |
| 26                    | -               | -               | Hospital Universitario A Coruña (CHUAC)                |

|    |   |   |                                         |
|----|---|---|-----------------------------------------|
| 27 | - | - | Hospital Universitario A Coruña (CHUAC) |
| 28 | - | - | Hospital Universitario A Coruña (CHUAC) |
| 29 | - | - | Hospital Universitario A Coruña (CHUAC) |
| 30 | - | - | Hospital Universitario A Coruña (CHUAC) |
| 31 | - | - | Hospital Universitario A Coruña (CHUAC) |
| 32 | - | - | Hospital Universitario A Coruña (CHUAC) |
| 33 | - | - | Hospital Universitario A Coruña (CHUAC) |
| 34 | - | - | Hospital Universitario A Coruña (CHUAC) |
| 35 | - | - | Hospital Universitario A Coruña (CHUAC) |
| 36 | - | - | Hospital Universitario A Coruña (CHUAC) |
| 37 | - | - | Hospital Universitario A Coruña (CHUAC) |
| 38 | - | - | Hospital Universitario A Coruña (CHUAC) |
| 39 | - | - | Hospital Universitario A Coruña (CHUAC) |
| 40 | - | - | Hospital Universitario A Coruña (CHUAC) |
| 41 | - | - | Hospital Universitario A Coruña (CHUAC) |
| 42 | - | - | Hospital Universitario A Coruña (CHUAC) |
| 43 | - | - | Hospital Universitario A Coruña (CHUAC) |
| 44 | - | - | Hospital Universitario A Coruña (CHUAC) |
| 45 | - | - | Hospital Universitario A Coruña (CHUAC) |
| 46 | - | - | Hospital Universitario A Coruña (CHUAC) |
| 47 | - | - | Hospital Universitario A Coruña (CHUAC) |
| 48 | - | - | Hospital Universitario A Coruña (CHUAC) |
| 49 | - | - | Hospital Universitario A Coruña (CHUAC) |
| 50 | - | - | Hospital Universitario A Coruña (CHUAC) |
| 51 | - | - | Hospital Universitario A Coruña (CHUAC) |
| 52 | - | - | Hospital Universitario A Coruña (CHUAC) |
| 53 | - | - | Hospital Universitario A Coruña (CHUAC) |
| 54 | - | - | Hospital Universitario A Coruña (CHUAC) |
| 55 | - | - | Hospital Universitario A Coruña (CHUAC) |
| 56 | - | - | Hospital Universitario A Coruña (CHUAC) |
| 57 | - | - | Hospital Universitario A Coruña (CHUAC) |
| 58 | - | - | Hospital Universitario A Coruña (CHUAC) |
| 59 | - | - | Hospital Universitario A Coruña (CHUAC) |
| 60 | - | - | Hospital Universitario A Coruña (CHUAC) |
| 61 | - | - | Hospital Universitario A Coruña (CHUAC) |
| 62 | - | - | Hospital Universitario A Coruña (CHUAC) |
| 63 | - | - | Hospital Universitario A Coruña (CHUAC) |
| 64 | - | - | Hospital Universitario A Coruña (CHUAC) |
| 65 | - | - | Hospital Universitario A Coruña (CHUAC) |
| 66 | - | - | Hospital Universitario A Coruña (CHUAC) |
| 67 | - | - | Hospital Universitario A Coruña (CHUAC) |
| 68 | - | - | Hospital Universitario A Coruña (CHUAC) |
| 69 | - | - | Hospital Universitario A Coruña (CHUAC) |
| 70 |   |   | Hospital Universitario A Coruña (CHUAC) |

U\* Unknown origin

<sup>a</sup> Strains processed in the inter-laboratory study.

<sup>b</sup> Isolates were screening for carbapenemase production according to the screening cut-off values recommended by EUCAST, that is having a meropenem or ertapenem MIC > 0,125 mg/L. Carbapenemase non-producing isolates *K. pneumoniae* were not genotypically characterized.

**Table S4. Results of the final validation test**

| Isolate | Resistance gene <sup>1</sup> | RF <sup>2</sup>                         |                                          |                         |                          |
|---------|------------------------------|-----------------------------------------|------------------------------------------|-------------------------|--------------------------|
|         |                              | M <sup>THRESHOLD</sup> raw <sup>3</sup> | M <sup>THRESHOLD</sup> norm <sup>4</sup> | M <sup>LINEAR</sup> raw | M <sup>LINEAR</sup> norm |
| AI3042  | KPC                          | OXA-48                                  | OXA-48                                   | OXA-48                  | OXA-48                   |
| AI3048  | KPC                          | OXA-48                                  | OXA-48                                   | OXA-48                  | OXA-48                   |
| AI3056  | KPC                          | OXA-48                                  | OXA-48                                   | OXA-48                  | OXA-48                   |
| AI2979  | KPC                          | OXA-48                                  | OXA-48                                   | OXA-48                  | OXA-48                   |
| AI2805  | KPC                          | KPC                                     | KPC                                      | KPC                     | KPC                      |
| AI2807  | KPC                          | OXA-48                                  | KPC                                      | KPC                     | KPC                      |
| AI2808  | KPC                          | KPC                                     | KPC                                      | OXA-48                  | KPC                      |
| AI2809  | KPC                          | KPC                                     | KPC                                      | KPC                     | KPC                      |
| AI2810  | KPC                          | KPC                                     | KPC                                      | KPC                     | KPC                      |
| AI2811  | KPC                          | OXA-48                                  | KPC                                      | KPC                     | KPC                      |
| AI2813  | KPC                          | KPC                                     | KPC                                      | KPC                     | KPC                      |
| AI2814  | KPC                          | -                                       | KPC                                      | OXA-48                  | KPC                      |
| AI2816  | KPC                          | KPC                                     | KPC                                      | KPC                     | KPC                      |
| AI2817  | KPC                          | KPC                                     | KPC                                      | KPC                     | KPC                      |
| AI2700  | KPC                          | KPC                                     | KPC                                      | OXA-48                  | KPC                      |
| AI2701  | KPC                          | KPC                                     | KPC                                      | KPC                     | KPC                      |
| AI2706  | KPC                          | KPC                                     | KPC                                      | KPC                     | KPC                      |
| AI2980  | KPC                          | KPC                                     | KPC                                      | KPC                     | KPC                      |
| AI2713  | KPC                          | KPC                                     | KPC                                      | KPC                     | KPC                      |
| AI2717  | KPC                          | KPC                                     | KPC                                      | KPC                     | KPC                      |
| AI2985  | KPC                          | KPC                                     | KPC                                      | KPC                     | KPC                      |
| AI3060  | KPC                          | KPC                                     | KPC                                      | KPC                     | KPC                      |
| 2       | KPC                          | KPC                                     | -                                        | KPC                     | KPC                      |
| 3       | KPC                          | KPC                                     | OXA-48                                   | OXA-48                  | OXA-48                   |
| 4       | KPC                          | KPC                                     | KPC                                      | OXA-48                  | OXA-48                   |
| 5       | KPC                          | OXA-48                                  | OXA-48                                   | OXA-48                  | OXA-48                   |
| 7       | KPC                          | OXA-48                                  | OXA-48                                   | OXA-48                  | OXA-48                   |
| 8       | KPC                          | KPC                                     | KPC                                      | KPC                     | KPC                      |
| 9       | KPC                          | KPC                                     | KPC                                      | KPC                     | KPC                      |
| 10      | KPC                          | KPC                                     | KPC                                      | KPC                     | KPC                      |
| 11      | KPC                          | KPC                                     | OXA-48                                   | OXA-48                  | OXA-48                   |
| 12      | KPC                          | OXA-48                                  | OXA-48                                   | OXA-48                  | OXA-48                   |
| 13      | KPC                          | KPC                                     | OXA-48                                   | OXA-48                  | OXA-48                   |
| AI2628  | KPC                          | KPC                                     | KPC                                      | KPC                     | KPC                      |
| AI2629  | KPC                          | KPC                                     | KPC                                      | KPC                     | KPC                      |
| AI2836  | KPC                          | KPC                                     | KPC                                      | KPC                     | KPC                      |
| AI2898  | NDM                          | NDM                                     | NDM                                      | OXA-48                  | NDM                      |
| AI2779  | NDM                          | KPC                                     | KPC                                      | KPC                     | OXA-48                   |
| AI2793  | NDM                          | OXA-48                                  | OXA-48                                   | OXA-48                  | NDM                      |
| AI2819  | OXA-48                       | OXA-48                                  | OXA-48                                   | OXA-48                  | OXA-48                   |
| AI2874  | OXA-48                       | KPC                                     | -                                        | OXA-48                  | OXA-48                   |
| AI2875  | OXA-48                       | OXA-48                                  | OXA-48                                   | OXA-48                  | OXA-48                   |
| AI2876  | OXA-48                       | OXA-48                                  | OXA-48                                   | OXA-48                  | OXA-48                   |
| AI2878  | OXA-48                       | KPC                                     | -                                        | KPC                     | OXA-48                   |
| AI2879  | OXA-48                       | OXA-48                                  | OXA-48                                   | OXA-48                  | OXA-48                   |
| AI2594  | OXA-48                       | KPC                                     | -                                        | OXA-48                  | OXA-48                   |
| AI2886  | OXA-48                       | OXA-48                                  | OXA-48                                   | OXA-48                  | OXA-48                   |
| AI2892  | OXA-48                       | OXA-48                                  | OXA-48                                   | OXA-48                  | OXA-48                   |
| AI2895  | OXA-48                       | KPC                                     | OXA-48                                   | KPC                     | OXA-48                   |



|        |         |        |        |        |        |
|--------|---------|--------|--------|--------|--------|
| AI2665 | OXA-48  | OXA-48 | OXA-48 | OXA-48 | OXA-48 |
| AI2669 | OXA-48  | OXA-48 | OXA-48 | OXA-48 | OXA-48 |
| AI2698 | OXA-48  | OXA-48 | OXA-48 | OXA-48 | OXA-48 |
| AI2739 | OXA-48  | OXA-48 | OXA-48 | OXA-48 | OXA-48 |
| AI2742 | OXA-48  | OXA-48 | OXA-48 | OXA-48 | OXA-48 |
| AI2743 | OXA-48  | OXA-48 | OXA-48 | OXA-48 | OXA-48 |
| AI2745 | OXA-48  | OXA-48 | OXA-48 | OXA-48 | OXA-48 |
| AI2763 | OXA-48  | OXA-48 | KPC    | OXA-48 | OXA-48 |
| AI2764 | OXA-48  | OXA-48 | OXA-48 | OXA-48 | OXA-48 |
| AI2765 | OXA-48  | OXA-48 | OXA-48 | OXA-48 | NDM    |
| AI2766 | OXA-48  | OXA-48 | OXA-48 | OXA-48 | NDM    |
| AI2767 | OXA-48  | KPC    | OXA-48 | OXA-48 | OXA-48 |
| AI2993 | OXA-48  | OXA-48 | OXA-48 | OXA-48 | NDM    |
| AI2768 | OXA-48  | OXA-48 | OXA-48 | OXA-48 | OXA-48 |
| AI2770 | OXA-48  | OXA-48 | OXA-48 | OXA-48 | OXA-48 |
| AI2773 | OXA-48  | OXA-48 | OXA-48 | OXA-48 | OXA-48 |
| AI2775 | OXA-48  | OXA-48 | OXA-48 | OXA-48 | OXA-48 |
| AI3001 | OXA-48  | OXA-48 | OXA-48 | OXA-48 | OXA-48 |
| AI2776 | OXA-48  | OXA-48 | OXA-48 | OXA-48 | OXA-48 |
| AI2777 | OXA-48  | OXA-48 | OXA-48 | OXA-48 | OXA-48 |
| AI2780 | OXA-48  | OXA-48 | OXA-48 | OXA-48 | OXA-48 |
| AI3002 | OXA-48  | OXA-48 | OXA-48 | OXA-48 | OXA-48 |
| AI3003 | OXA-48  | OXA-48 | OXA-48 | OXA-48 | OXA-48 |
| AI3004 | OXA-48  | KPC    | OXA-48 | OXA-48 | OXA-48 |
| AI3006 | OXA-48  | OXA-48 | OXA-48 | OXA-48 | OXA-48 |
| AI2612 | OXA-48  | KPC    | OXA-48 | KPC    | OXA-48 |
| AI2789 | OXA-48  | OXA-48 | OXA-48 | OXA-48 | OXA-48 |
| AI3009 | OXA-48  | OXA-48 | OXA-48 | OXA-48 | OXA-48 |
| AI2794 | OXA-48  | OXA-48 | OXA-48 | OXA-48 | OXA-48 |
| AI2630 | OXA-48  | KPC    | OXA-48 | KPC    | OXA-48 |
| 14     | OXA-48  | OXA-48 | OXA-48 | OXA-48 | OXA-48 |
| 15     | OXA-48  | OXA-48 | OXA-48 | OXA-48 | OXA-48 |
| 16     | OXA-48  | OXA-48 | OXA-48 | OXA-48 | OXA-48 |
| 17     | OXA-48  | KPC    | -      | OXA-48 | OXA-48 |
| AI2818 | OXA-48  | OXA-48 | OXA-48 | OXA-48 | OXA-48 |
| 20     | non CPK | -      | OXA-48 | -      | -      |
| 21     |         | -      | -      | -      | -      |
| 23     |         | -      | -      | -      | -      |
| 24     |         | -      | -      | -      | -      |
| 25     |         | -      | -      | -      | -      |
| 27     |         | -      | -      | -      | -      |
| 30     |         | -      | -      | -      | -      |
| 31     |         | -      | -      | -      | -      |
| 32     |         | -      | -      | -      | -      |
| 33     |         | -      | -      | -      | -      |
| 34     |         | -      | -      | -      | -      |
| 36     |         | -      | -      | -      | -      |
| 37     |         | -      | -      | -      | -      |
| 38     |         | OXA-48 | OXA-48 | -      | -      |
| 39     |         | -      | -      | -      | -      |
| 40     |         | -      | -      | -      | -      |
| 41     | -       | -      | -      | -      |        |
| 43     | -       | -      | -      | -      |        |

|    |   |        |   |   |
|----|---|--------|---|---|
| 45 | - | -      | - | - |
| 47 | - | -      | - | - |
| 48 | - | -      | - | - |
| 49 | - | -      | - | - |
| 50 | - | -      | - | - |
| 53 | - | -      | - | - |
| 54 | - | -      | - | - |
| 55 | - | -      | - | - |
| 56 | - | -      | - | - |
| 57 | - | OXA-48 | - | - |
| 58 | - | -      | - | - |
| 59 | - | -      | - | - |
| 60 | - | -      | - | - |
| 63 | - | -      | - | - |
| 64 | - | -      | - | - |
| 65 | - | -      | - | - |
| 66 | - | -      | - | - |
| 67 | - | -      | - | - |
| 68 | - | -      | - | - |
| 69 | - | -      | - | - |

<sup>1</sup> Resistance gene obtained by the molecular characterization of the isolates

<sup>2</sup> Random Forest (RF) analysis

<sup>3</sup> Results obtained with the raw spectra

<sup>4</sup> Results obtained with the normalized spectra

**Figure 1. RF-M<sub>LINEAR</sub> features importance**

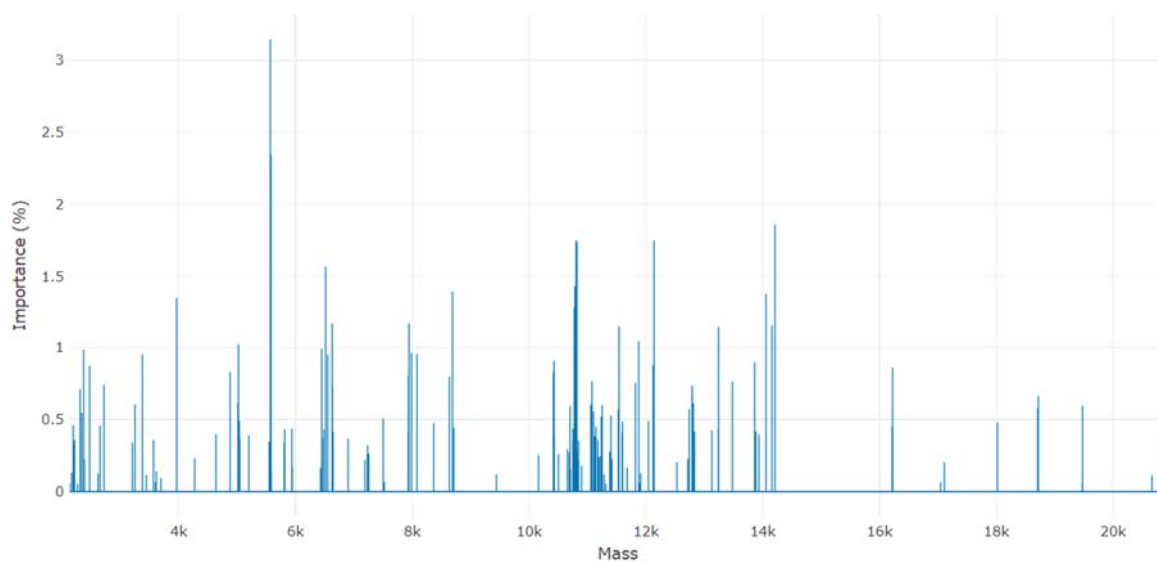

The graph represents the importance of each mass peak for the result of the analysis. On the X-axis, the individual sample masses are represented and on the Y-axis the percentage of importance of each mass peak for the decision making in the allocation of each isolate into one of the categories of the analysis (OXA-48, KPC, NDM, non CPK) is represented.
